# Supplementary material
Source: bioRxiv or medRxiv preprint supplement (https://medrxiv.org/highwire/filestream/92782/field_highwire_adjunct_files/1/2020.08.10.20171884-2.pdf)
Supplement: Supplementary file [file 2020.08.10.20171884-2.pdf]

**Table S2. List of SARS-CoV-2 Spike amino acid sequences with mutations in the 839 site available at GISAID, as of July 23<sup>rd</sup>, 2020.** Nextstrain clade was determined using Nextclade online tool (<https://clades.nextstrain.org/>). Acknowledgement regarding sequences from GISAID's EpiFlu™ Database: We acknowledge the authors, originating and submitting laboratories of the sequences from GISAID's Database on which this research is based. The list is detailed below.

| virus ID                        | Mutation in Spike amino acid D839 | Spike D614G background | Nextstrain clade | GISAID Accession ID | date of collection | continent | country        | region      |
|---------------------------------|-----------------------------------|------------------------|------------------|---------------------|--------------------|-----------|----------------|-------------|
| Italy/PV-5314-N/2020            | D839Y                             | G614                   | 20A              | EPI_ISL_451307      | 2020-02-21         | Europe    | Italy          | Lombardy    |
| Netherlands/Diemen_1363454/2020 | D839E                             | G614                   | 20B              | EPI_ISL_413570      | 2020-02-28         | Europe    | Netherlands    | Netherlands |
| England/20099107406/2020        | D839Y                             | G614                   | 20A              | EPI_ISL_415131      | 2020-02-29         | Europe    | United Kingdom | England     |
| England/20102000506/2020        | D839Y                             | G614                   | 20A              | EPI_ISL_415147      | 2020-03-01         | Europe    | United Kingdom | England     |
| England/201061455/2020          | D839Y                             | G614                   | 20A              | EPI_ISL_464413      | 2020-03-01         | Europe    | United Kingdom | England     |
| England/CAMB-847A5/2020         | D839Y                             | G614                   | 20A              | EPI_ISL_440513      | 2020-03-01         | Europe    | United Kingdom | England     |
| Iceland/14/2020                 | D839Y                             | G614                   | 20A              | EPI_ISL_417736      | 2020-03-01         | Europe    | Iceland        | Reykjavik   |
| England/20102132304/2020        | D839Y                             | G614                   | 20A              | EPI_ISL_464290      | 2020-03-02         | Europe    | United Kingdom | England     |
| England/20104009002/2020        | D839Y                             | G614                   | 20A              | EPI_ISL_417233      | 2020-03-02         | Europe    | United Kingdom | England     |
| Iceland/20/2020                 | D839Y                             | G614                   | 20A              | EPI_ISL_417695      | 2020-03-02         | Europe    | Iceland        | Reykjavik   |
| England/20108003302/2020        | D839Y                             | G614                   | 20A              | EPI_ISL_417248      | 2020-03-03         | Europe    | United Kingdom | England     |
| England/20108004803/2020        | D839Y                             | G614                   | 20A              | EPI_ISL_417251      | 2020-03-03         | Europe    | United Kingdom | England     |
| England/201080050/2020          | D839Y                             | G614                   | 20A              | EPI_ISL_464442      | 2020-03-03         | Europe    | United Kingdom | England     |
| England/BRIS-12177C/2020        | D839Y                             | G614                   | 20A              | EPI_ISL_440256      | 2020-03-03         | Europe    | United Kingdom | England     |
| England/BRIS-12178B/2020        | D839Y                             | G614                   | 20A              | EPI_ISL_440212      | 2020-03-03         | Europe    | United Kingdom | England     |
| England/BRIS-12F5A1/2020        | D839Y                             | G614                   | 20A              | EPI_ISL_488219      | 2020-03-03         | Europe    | United Kingdom | England     |
| England/201060017/2020          | D839Y                             | G614                   | 20A              | EPI_ISL_464362      | 2020-03-04         | Europe    | United Kingdom | England     |
| England/201080076/2020          | D839Y                             | G614                   | 20A              | EPI_ISL_464459      | 2020-03-04         | Europe    | United Kingdom | England     |
| England/20110000706/2020        | D839Y                             | G614                   | 20A              | EPI_ISL_417302      | 2020-03-05         | Europe    | United Kingdom | England     |
| England/20110000606/2020        | D839Y                             | G614                   | 20A              | EPI_ISL_417301      | 2020-03-06         | Europe    | United Kingdom | England     |
| England/20110000906/2020        | D839Y                             | G614                   | 20A              | EPI_ISL_417304      | 2020-03-06         | Europe    | United Kingdom | England     |
| England/BRIS-12F617/2020        | D839Y                             | G614                   | 20A              | EPI_ISL_488253      | 2020-03-06         | Europe    | United Kingdom | England     |
| England/20109007304/2020        | D839Y                             | G614                   | 20A              | EPI_ISL_464527      | 2020-03-07         | Europe    | United Kingdom | England     |
| England/201090513/2020          | D839Y                             | G614                   | 20A              | EPI_ISL_464577      | 2020-03-07         | Europe    | United Kingdom | England     |
| Iceland/69/2020                 | D839Y                             | G614                   | 20A              | EPI_ISL_417749      | 2020-03-08         | Europe    | Iceland        | Reykjavik   |
| England/201120242/2020          | D839Y                             | G614                   | 20A              | EPI_ISL_464672      | 2020-03-09         | Europe    | United Kingdom | England     |
| England/201140338/2020          | D839Y                             | G614                   | 20A              | EPI_ISL_464724      | 2020-03-09         | Europe    | United Kingdom | England     |
| England/BRIS-12F750/2020        | D839Y                             | G614                   | 20A              | EPI_ISL_488349      | 2020-03-09         | Europe    | United Kingdom | England     |
| Iceland/103/2020                | D839Y                             | G614                   | 20A              | EPI_ISL_417698      | 2020-03-10         | Europe    | Iceland        | Reykjavik   |
| England/201140062/2020          | D839Y                             | G614                   | 20A              | EPI_ISL_464713      | 2020-03-11         | Europe    | United Kingdom | England     |
| England/20119002104/2020        | D839Y                             | G614                   | 20A              | EPI_ISL_465007      | 2020-03-12         | Europe    | United Kingdom | England     |
| England/CAMB-75516/2020         | D839Y                             | G614                   | 20A              | EPI_ISL_425401      | 2020-03-13         | Europe    | United Kingdom | England     |

|                                  |       |      |     |                |            |         |                |               |
|----------------------------------|-------|------|-----|----------------|------------|---------|----------------|---------------|
| Georgia/Tb/2020                  | D839Y | G614 | 20A | EPI_ISL_416482 | 2020-03-13 | Asia    | Georgia        | Tbilisi       |
| Netherlands/ZuidHolland_44/2020  | D839Y | G614 | 20A | EPI_ISL_422916 | 2020-03-19 | Europe  | Netherlands    | South Holland |
| Netherlands/ZuidHolland_45/2020  | D839Y | G614 | 20A | EPI_ISL_422917 | 2020-03-19 | Europe  | Netherlands    | South Holland |
| Netherlands/ZuidHolland_52/2020  | D839Y | G614 | 20A | EPI_ISL_422920 | 2020-03-19 | Europe  | Netherlands    | South Holland |
| Poland/1105973/2020              | D839Y | G614 | 20A | EPI_ISL_428234 | 2020-03-19 | Europe  | Poland         | Pomorskie     |
| NewZealand/20VR1278/2020         | D839Y | G614 | 20A | EPI_ISL_456203 | 2020-03-20 | Oceania | New Zealand    | Auckland      |
| Netherlands/NA_165/2020          | D839Y | G614 | 20A | EPI_ISL_422700 | 2020-03-21 | Europe  | Netherlands    | Netherlands   |
| Netherlands/NA_173/2020          | D839Y | G614 | 20A | EPI_ISL_422708 | 2020-03-22 | Europe  | Netherlands    | Netherlands   |
| Netherlands/Utrecht_10022/2020   | D839Y | G614 | 20A | EPI_ISL_454771 | 2020-03-23 | Europe  | Netherlands    | Utrecht       |
| England/NORT-281D2C/2020         | D839G | D614 | 19A | EPI_ISL_478483 | 2020-03-24 | Europe  | United Kingdom | England       |
| Netherlands/ZuidHolland_73/2020  | D839Y | G614 | 20A | EPI_ISL_422941 | 2020-03-24 | Europe  | Netherlands    | South Holland |
| Austria/CeMM0397/2020            | D839Y | G614 | 20A | EPI_ISL_475834 | 2020-03-25 | Europe  | Austria        | Austria       |
| Wales/PHWC-25EDE/2020            | D839N | D614 | 19A | EPI_ISL_422317 | 2020-03-25 | Europe  | United Kingdom | Wales         |
| Switzerland/100799/2020          | D839Y | G614 | 20A | EPI_ISL_451749 | 2020-03-25 | Europe  | Switzerland    | Uri           |
| Switzerland/100804/2020          | D839Y | G614 | 20A | EPI_ISL_451754 | 2020-03-25 | Europe  | Switzerland    | Uri           |
| USA/TX-HMH0273/2020              | D839Y | G614 | 20A | EPI_ISL_434901 | 2020-03-26 | America | USA            | Texas         |
| Switzerland/110014_159_F6/2020   | D839Y | G614 | 20A | EPI_ISL_486454 | 2020-04-01 | Europe  | Switzerland    | Uri           |
| Netherlands/NA_308/2020          | D839Y | G614 | 20A | EPI_ISL_422617 | 2020-04-02 | Europe  | Netherlands    | Netherlands   |
| NewZealand/20VR2058/2020         | D839Y | G614 | 20A | EPI_ISL_456352 | 2020-04-05 | Oceania | New Zealand    | Canterbury    |
| NewZealand/20VR2065/2020         | D839Y | G614 | 20A | EPI_ISL_456356 | 2020-04-06 | Oceania | New Zealand    | Canterbury    |
| NewZealand/20VR2067/2020         | D839Y | G614 | 20A | EPI_ISL_456358 | 2020-04-06 | Oceania | New Zealand    | Canterbury    |
| England/EXET-136DAF/2020         | D839Y | G614 | 20A | EPI_ISL_471924 | 2020-04-07 | Europe  | United Kingdom | England       |
| NewZealand/20VR2075/2020         | D839Y | G614 | 20A | EPI_ISL_456362 | 2020-04-09 | Oceania | New Zealand    | Canterbury    |
| NewZealand/20VR2076/2020         | D839Y | G614 | 20A | EPI_ISL_456363 | 2020-04-09 | Oceania | New Zealand    | Canterbury    |
| NewZealand/20VR2077/2020         | D839Y | G614 | 20A | EPI_ISL_456364 | 2020-04-09 | Oceania | New Zealand    | Canterbury    |
| NewZealand/20VR2078/2020         | D839Y | G614 | 20A | EPI_ISL_456365 | 2020-04-09 | Oceania | New Zealand    | Canterbury    |
| NewZealand/20VR2079/2020         | D839Y | G614 | 20A | EPI_ISL_456366 | 2020-04-09 | Oceania | New Zealand    | Canterbury    |
| NewZealand/20VR2093/2020         | D839Y | G614 | 20A | EPI_ISL_456374 | 2020-04-10 | Oceania | New Zealand    | Canterbury    |
| Wales/PHWC-2B579/2020            | D839Y | G614 | 20A | EPI_ISL_445727 | 2020-04-10 | Europe  | United Kingdom | Wales         |
| NewZealand/20VR2081/2020         | D839Y | G614 | 20A | EPI_ISL_456367 | 2020-04-11 | Oceania | New Zealand    | Canterbury    |
| NewZealand/20VR2085/2020         | D839Y | G614 | 20A | EPI_ISL_456369 | 2020-04-12 | Oceania | New Zealand    | Canterbury    |
| NewZealand/20VR2088/2020         | D839Y | G614 | 20A | EPI_ISL_456371 | 2020-04-12 | Oceania | New Zealand    | Canterbury    |
| Wales/PHWC-31516/2020            | D839Y | G614 | 20A | EPI_ISL_446456 | 2020-04-12 | Europe  | United Kingdom | Wales         |
| Wales/PHWC-31B9C/2020            | D839Y | G614 | 20A | EPI_ISL_446537 | 2020-04-12 | Europe  | United Kingdom | Wales         |
| England/BRIS-12F26E/2020         | D839Y | G614 | 20A | EPI_ISL_488372 | 2020-04-13 | Europe  | United Kingdom | England       |
| England/BRIS-12F4D1/2020         | D839Y | G614 | 20A | EPI_ISL_488265 | 2020-04-13 | Europe  | United Kingdom | England       |
| England/BRIS-12F4E0/2020         | D839Y | G614 | 20A | EPI_ISL_488309 | 2020-04-13 | Europe  | United Kingdom | England       |
| England/EXET-135915/2020         | D839Y | G614 | 20A | EPI_ISL_457116 | 2020-04-13 | Europe  | United Kingdom | England       |
| Netherlands/ZuidHolland_141/2020 | D839Y | G614 | 20A | EPI_ISL_461314 | 2020-04-13 | Europe  | Netherlands    | South Holland |
| NewZealand/20VR2089/2020         | D839Y | G614 | 20A | EPI_ISL_456372 | 2020-04-13 | Oceania | New Zealand    | Canterbury    |
| England/EXET-135863/2020         | D839Y | G614 | 20A | EPI_ISL_457108 | 2020-04-15 | Europe  | United Kingdom | England       |
| England/EXET-1358BE/2020         | D839Y | G614 | 20A | EPI_ISL_457112 | 2020-04-15 | Europe  | United Kingdom | England       |

|                             |       |      |     |                |            |         |                |           |
|-----------------------------|-------|------|-----|----------------|------------|---------|----------------|-----------|
| Wales/PHWC-3415B/2020       | D839Y | G614 | 20A | EPI_ISL_446877 | 2020-04-16 | Europe  | United Kingdom | Wales     |
| Wales/PHWC-3416A/2020       | D839Y | G614 | 20A | EPI_ISL_446878 | 2020-04-16 | Europe  | United Kingdom | Wales     |
| Wales/PHWC-34461/2020       | D839Y | G614 | 20A | EPI_ISL_446924 | 2020-04-16 | Europe  | United Kingdom | Wales     |
| Wales/PHWC-34470/2020       | D839Y | G614 | 20A | EPI_ISL_446925 | 2020-04-16 | Europe  | United Kingdom | Wales     |
| Wales/PHWC-15C329/2020      | D839Y | G614 | 20A | EPI_ISL_472471 | 2020-04-18 | Europe  | United Kingdom | Wales     |
| Wales/PHWC-35A6E/2020       | D839Y | G614 | 20A | EPI_ISL_474518 | 2020-04-24 | Europe  | United Kingdom | Wales     |
| Wales/PHWC-163E00/2020      | D839Y | G614 | 20C | EPI_ISL_474528 | 2020-04-24 | Europe  | United Kingdom | Wales     |
| Wales/PHWC-163E00/2020      | D839Y | G614 | 20A | EPI_ISL_474087 | 2020-04-25 | Europe  | United Kingdom | Wales     |
| England/TBSD-2488DC3/2020   | D839Y | G614 | 20A | EPI_ISL_482060 | 2020-04-26 | Europe  | United Kingdom | England   |
| Wales/PHWC-35F41/2020       | D839Y | G614 | 20A | EPI_ISL_474594 | 2020-04-27 | Europe  | United Kingdom | Wales     |
| England/TBSD-2488E57/2020   | D839Y | G614 | 20A | EPI_ISL_482059 | 2020-04-28 | Europe  | United Kingdom | England   |
| Switzerland/120232/2020     | D839Y | G614 | 20A | EPI_ISL_468293 | 2020-05-01 | Europe  | Switzerland    | Uri       |
| England/BRIS-12D87D/2020    | D839Y | G614 | 20A | EPI_ISL_481951 | 2020-05-06 | Europe  | United Kingdom | England   |
| England/NORT-295AF1/2020    | D839G | D614 | 19A | EPI_ISL_472288 | 2020-05-08 | Europe  | United Kingdom | England   |
| Wales/PHWC-16095D/2020      | D839Y | G614 | 20A | EPI_ISL_472997 | 2020-05-18 | Europe  | United Kingdom | Wales     |
| Wales/PHWC-160B84/2020      | D839Y | G614 | 20A | EPI_ISL_473022 | 2020-05-21 | Europe  | United Kingdom | Wales     |
| India/InStem_NCBS_0020/2020 | D839Y | G614 | 20A | EPI_ISL_477222 | 2020-06-11 | Asia    | India          | Karnataka |
| India/InStem_NCBS_0021/2020 | D839Y | G614 | 20A | EPI_ISL_477223 | 2020-06-11 | Asia    | India          | Karnataka |
| India/InStem_NCBS_0081/2020 | D839Y | G614 | 20A | EPI_ISL_479752 | 2020-06-17 | Asia    | India          | Karnataka |
| Australia/VIC2137/2020      | D839N | G614 | 20A | EPI_ISL_480738 | 2020-06-20 | Oceania | Australia      | Victoria  |
| England/OXON-B0667/2020     | D839Y | G614 | 20A | EPI_ISL_478896 | 2020       | Europe  | United Kingdom | England   |
| India/InStem_NCBS_0089/2020 | D839Y | G614 | 20A | EPI_ISL_486838 | 2020       | Asia    | India          | Karnataka |
| Estonia/ChVir1985/2020      | D839Y | G614 | 20A | EPI_ISL_420067 | 2020-03    | Europe  | Estonia        | Estonia   |
